# Supplementary material for: Occurrence and Evolution of the Paralogous Zinc Metalloproteases IgA1 Protease, ZmpB, ZmpC, and ZmpD in Streptococcus pneumoniae and Related Commensal Species
Source: PubMed Central journal article supplement — mBio. 2012 Oct 2;3(5):e00303-12. doi: 10.1128/mBio.00303-12 (PMC3518915; doi:10.1128/mbio.00303-12), 2012-10-02
Supplement: mbo005121341st1.pdf [file mbo005121341st1.pdf]

**Table S1.** Strains represented by the 297 sequences used in the present study

| Species              | Strain       | Status               | Accession number<br>Genebank |
|----------------------|--------------|----------------------|------------------------------|
| <i>S. pneumoniae</i> | D39          | Complete genome      | CP000410                     |
|                      | R6           | Complete genome      | AE007317                     |
|                      | SP6-BS73     | Draft genome         | ABAA00000000                 |
|                      | Spn033038    | Draft genome         | FQ312042                     |
|                      | 70585        | Complete genome      | CP000918                     |
|                      | Spn032672    | Draft genome         | FQ312039                     |
|                      | INV104       | Complete genome      | FQ312030                     |
|                      | Spn061370    | Draft genome         | CACJ01000000                 |
|                      | SP18-BS74    | Draft genome         | ABAE00000000                 |
|                      | 670-6B       | Complete genome      | CP002176                     |
|                      | SP23-BS72    | Draft genome         | ABAG00000000                 |
|                      | Taiwan19F-14 | Complete genome      | CP000921                     |
|                      | TIGR4        | Complete genome      | AE005672                     |
|                      | CCRI1974     | Draft genome         | ABZC00000000                 |
|                      | CCRI1974/M2  | Draft genome         | ABZT00000000                 |
|                      | PK81         | Single gene sequence | X94909                       |
|                      | SP19-BS75    | Draft genome         | ABAF00000000                 |
|                      | OXC141       | Complete genome      | FQ312027                     |
|                      | Spn034156    | Draft genome         | FQ312045                     |
|                      | Spn072838    | Draft genome         | CACI01000000                 |
|                      | Spn994038    | Draft genome         | FQ312041                     |
|                      | Spn994039    | Draft genome         | FQ312044                     |
|                      | Hungary19A-6 | Complete genome      | CP000936                     |
|                      | SP11-BS70    | Draft genome         | ABAC00000000                 |
|                      | AP200        | Draft genome         | CP002121                     |
|                      | P1031        | Complete genome      | CP000920                     |
|                      | JJA          | Complete genome      | CP000919                     |
|                      | P1041        | Draft genome         | CACE01000000                 |
|                      | CDC0288-04   | Draft genome         | ABGF00000000                 |
|                      | SPN7465      | Draft genome         | CACF01000000                 |
|                      | ATCC 700669  | Complete genome      | FM211187                     |
|                      | CDC3059_06   | Draft genome         | ABGG00000000                 |
|                      | CGSP14       | Complete genome      | CP001033                     |
|                      | INV200       | Complete genome      | FQ312029                     |
|                      | CDC1087-00   | Draft genome         | ABFT00000000                 |
|                      | SP195        | Draft genome         | ABGE00000000                 |
|                      | G54          | Complete genome      | CP001015                     |
|                      | MLV-016      | Draft genome         | ABGH00000000                 |
|                      | CDC1873-00   | Draft genome         | ABFS00000000                 |
|                      | SP9-BS68     | Draft genome         | ABAB00000000                 |
|                      | SP14-BS69    | Draft genome         | ABAD00000000                 |
|                      | SP-BS293     | Draft genome         | ABWU00000000                 |
|                      | BS458        | Draft genome         | ABWA00000000                 |
|                      | BS457        | Draft genome         | ABWB00000000                 |

|                                   |                                            |                      |              |
|-----------------------------------|--------------------------------------------|----------------------|--------------|
|                                   | BS397                                      | Draft genome         | ABWC00000000 |
|                                   | SP14-BS292                                 | Draft genome         | ABWQ00000000 |
|                                   | BS455                                      | Draft genome         | ADHN00000000 |
|                                   | Canada MDR_19A                             | Draft genome         | ACNU00000000 |
|                                   | Canada MDR_19F                             | Draft genome         | ACNV00000000 |
|                                   | SP3-BS71                                   | Draft genome         | AAZZ00000000 |
|                                   | Spn021198                                  | Draft genome         | CACH01000000 |
|                                   | SPNA45                                     | Draft genome         | CACG01000000 |
|                                   | Spn034183                                  | Draft genome         | FQ312043     |
|                                   | TCH8431/19A                                | Complete genome      | CP001993     |
|                                   | GA04375                                    | Draft genome         | AFAX00000000 |
|                                   | GA47901                                    | Draft genome         | AFGR00000000 |
|                                   | GA41301                                    | Draft genome         | AFGD00000000 |
|                                   | GA17545                                    | Draft genome         | AFGA00000000 |
|                                   | GA17570                                    | Draft genome         | AFGB00000000 |
|                                   | GA47368                                    | Draft genome         | AFGS00000000 |
|                                   | GA41317                                    | Draft genome         | AFGT00000000 |
|                                   | BT20                                       | Single gene sequence | BAG70974     |
|                                   | ND                                         | Single gene sequence | BAG70972     |
|                                   | ND                                         | Single gene sequence | BAG70973     |
|                                   | NUTH-p3                                    | Single gene sequence | BAF46263     |
|                                   | NUTH-p28                                   | Single gene sequence | BAF46262     |
|                                   | ND                                         | Single gene sequence | BAF46261     |
| <b><i>S. pseudopneumoniae</i></b> | IS7493                                     | Complete genome      | NC_015875    |
| <b><i>S. mitis</i></b>            | SK597                                      | Draft genome         | AEDV00000000 |
|                                   | SK609                                      | Single gene sequence | DQ004562     |
|                                   | SK564                                      | Draft genome         | AEDU00000000 |
|                                   | SK137                                      | Unpublished          |              |
|                                   | SK321                                      | Draft genome         | AEDT00000000 |
|                                   | SK142 (NCTC 12261 <sup>T</sup> )           | Draft genome         | AEDX00000000 |
|                                   | B6                                         | Complete genome      | FN568063     |
|                                   | SK569                                      | Draft genome         | AFUF00000000 |
|                                   | SK1080                                     | Draft genome         | AFQV00000000 |
|                                   | M334                                       | Draft genome         | ACRL00000000 |
|                                   | SK1073                                     | Draft genome         | AFQT00000000 |
| bv. 2                             | F0392                                      | Draft genome         | AFUO00000000 |
|                                   | M143                                       | Draft genome         | ACRK00000000 |
|                                   | SK95                                       | Draft genome         | AFUB00000000 |
| <b><i>S. infantis</i></b>         | SK1302                                     | Draft genome         | AEDY00000000 |
|                                   | ATCC 700779                                | Draft genome         | AEVD00000000 |
|                                   | SK970                                      | Draft genome         | AFUT00000000 |
| <b><i>S. oralis</i></b>           | SK23 (NCTC 11427 <sup>T</sup> /ATCC 35037) | Draft genome         | AEDW00000000 |
|                                   | SK2                                        | Single gene sequence | Y10286       |
|                                   | Uo5                                        | Complete genome      | NC_015291    |
|                                   | C300                                       | Draft genome         | ACRJ00000000 |
|                                   | SK141                                      | Single gene sequence | Y10285       |
|                                   | ATCC 6249                                  | Draft genome         | AEEN00000000 |

|                                  |             |                      |                 |
|----------------------------------|-------------|----------------------|-----------------|
|                                  | ATCC 49296  | Draft genome         | AEPO00000000    |
| <b><i>S. oligofermentans</i></b> | 73H25AP     | Draft genome         | NZ_AEEP00000000 |
| <b><i>S. sanguinis</i></b>       | SK36        | Complete genome      | CP000387        |
|                                  | SK161       | Single gene sequence | Y13457          |
|                                  | SK162       | Single gene sequence | Y13458          |
|                                  | SK49        | Single gene sequence | Y13460          |
|                                  | SK112       | Single gene sequence | Y13455          |
|                                  | SK85        | Single gene sequence | Y13461          |
|                                  | SK115       | Draft genome         | AEXW00000000    |
|                                  | SK4         | Single gene sequence | Y13459          |
|                                  | ATCC 10556  | Single gene sequence | L29504          |
|                                  | SK330       | Draft genome         | AFBD00000000    |
|                                  | SK1059      | Draft genome         | AFFM00000000    |
|                                  | ATCC 29667  | Draft genome         | AFQA00000000    |
|                                  | SK340       | Draft genome         | AFQB00000000    |
|                                  | SK408       | Draft genome         | AFBE00000000    |
|                                  | SK1057      | Draft genome         | AFBA00000000    |
|                                  | SK353       | Draft genome         | AEWY00000000    |
|                                  | SK72        | Draft genome         | AEXV00000000    |
|                                  | SK1058      | Draft genome         | AFBF00000000    |
|                                  | SK1         | Draft genome         | AFAZ00000000    |
|                                  | SK405       | Draft genome         | AEWZ00000000    |
|                                  | SK1087      | Draft genome         | AFDP00000000    |
|                                  | SK678       | Draft genome         | AEXA00000000    |
|                                  | SK160       | Draft genome         | AEXZ00000000    |
|                                  | SK150       | Draft genome         | AEXY00000000    |
|                                  | SK1056      | Draft genome         | AFFL00000000    |
|                                  | SK355       | Draft genome         | AFFN00000000    |
|                                  | VMC66       | Draft genome         | AEVH00000000    |
| <b><i>S. gordonii</i></b>        | NCTC 7868   | Complete genome      | CP000725        |
|                                  | 2_1_36FAA   | Draft genome         | ACOI00000000    |
| <b><i>S. salivarius</i></b>      | SK126       | Draft genome         | ACLO00000000    |
|                                  | M18         | Draft genome         | AGBV00000000    |
|                                  | CCHSS3      | Draft genome         | ACLO00000000    |
| <b><i>S. parasanguinis</i></b>   | ATCC 15912  | Draft genome         | ADVN00000000    |
|                                  | F0405       | Draft genome         | AEKM00000000    |
|                                  | ATCC 903    | Draft genome         | A EVE00000000   |
|                                  | SK236       | Draft genome         | AFUC00000000    |
| <b><i>S. vestibularis</i></b>    | ATCC 49124  | Draft genome         | AEVI00000000    |
|                                  | F0396       | Draft genome         | AEKO00000000    |
| <b><i>S. australis</i></b>       | ATCC 700641 | Draft genome         | AFUD00000000    |
| <b><i>S. cristatus</i></b>       | ATCC 51100  | Draft genome         | AFUE00000000    |
| <b><i>Streptococcus sp.</i></b>  | C150        | Draft genome         | ACRI00000000    |
|                                  | F0418       | Draft genome         | NZ_AFQU00000000 |
| <b><i>S. suis</i></b>            | 89/1591     | Draft genome         | AAFA00000000    |
|                                  | 05ZYH33     | Complete genome      | CP000407        |
|                                  | 98HAH33     | Complete genome      | CP000408        |

|                                       |             |                      |                 |
|---------------------------------------|-------------|----------------------|-----------------|
|                                       | BM407       | Complete genome      | FM252032        |
|                                       | P1/7        | Complete genome      | AM946016        |
|                                       | SC84        | Complete genome      | FM252031        |
|                                       | GZ1         | Complete genome      | CP000837        |
| <b><i>Gemella haemolysans</i></b>     | ATCC10379   | Draft genome         | ACDZ00000000    |
|                                       | CCUG 4815   | Single gene sequence | AY395568        |
|                                       | M341        | Draft genome         | ACRO00000000    |
| <b><i>Gemella sanguinis</i></b>       | M325        | Draft genome         | NZ_ACRY00000000 |
| <b><i>Gemella moribillorum</i></b>    | M424        | Draft genome         | NZ_ACRX00000000 |
| <b><i>Granulicatella adiacens</i></b> | ATCC 49175  | Draft genome         | ACKZ00000000    |
| <b><i>Granulicatella elegans</i></b>  | ATCC 700633 | Draft genome         | ACRF00000000    |
