# Supplementary material for: Occurrence and Evolution of the Paralogous Zinc Metalloproteases IgA1 Protease, ZmpB, ZmpC, and ZmpD in Streptococcus pneumoniae and Related Commensal Species
Source: PubMed Central journal article supplement — mBio. 2012 Oct 2;3(5):e00303-12. doi: 10.1128/mBio.00303-12 (PMC3518915; doi:10.1128/mbio.00303-12), 2012-10-02
Supplement: mbo005121341st2.pdf [file mbo005121341st2.pdf]

**Table S2.** Mean molecular distances between groups. Standard errors are in grey.

| <i>zmp/zmp</i> | <i>iga</i> | <i>zmpC</i> | <i>zmpB</i> | <i>zmpD</i> |
|----------------|------------|-------------|-------------|-------------|
| <i>iga</i>     |            | 0.018       | 0.025       | 0.029       |
| <i>zmpC</i>    | 0.708      |             | 0.025       | 0.029       |
| <i>zmpB</i>    | 0.951      | 0.951       |             | 0.014       |
| <i>zmpD</i>    | 0.943      | 0.959       | 0.566       |             |
