# Supplementary material for: Occurrence and Evolution of the Paralogous Zinc Metalloproteases IgA1 Protease, ZmpB, ZmpC, and ZmpD in Streptococcus pneumoniae and Related Commensal Species
Source: PubMed Central journal article supplement — mBio. 2012 Oct 2;3(5):e00303-12. doi: 10.1128/mBio.00303-12 (PMC3518915; doi:10.1128/mbio.00303-12), 2012-10-02
Supplement: mbo005121341st3.pdf [file mbo005121341st3.pdf]

**Table S3.** Mean molecular distances between ZmpB subgroups and the ZmpD cluster. Standard errors are in grey.

|                | <i>zmpB_1</i> | <i>zmpB_2</i> | <i>zmpB_3</i> | <i>zmpB_4</i> | <i>zmpB_5</i> | <i>zmpB_6</i> | <i>zmpB_7</i> | <i>zmpB_8</i> | <i>zmpB_9</i> | <i>zmpB_10</i> | <i>zmpD_11</i> |
|----------------|---------------|---------------|---------------|---------------|---------------|---------------|---------------|---------------|---------------|----------------|----------------|
| <i>zmpB_1</i>  |               | 0.010         | 0.009         | 0.011         | 0.015         | 0.014         | 0.015         | 0.017         | 0.018         | 0.023          | 0.013          |
| <i>zmpB_2</i>  | 0.266         |               | 0.005         | 0.012         | 0.015         | 0.014         | 0.013         | 0.018         | 0.018         | 0.019          | 0.014          |
| <i>zmpB_3</i>  | 0.225         | 0.089         |               | 0.009         | 0.016         | 0.014         | 0.013         | 0.019         | 0.018         | 0.021          | 0.014          |
| <i>zmpB_4</i>  | 0.301         | 0.353         | 0.231         |               | 0.013         | 0.014         | 0.016         | 0.017         | 0.020         | 0.025          | 0.011          |
| <i>zmpB_5</i>  | 0.504         | 0.480         | 0.508         | 0.422         |               | 0.013         | 0.015         | 0.022         | 0.021         | 0.027          | 0.012          |
| <i>zmpB_6</i>  | 0.440         | 0.446         | 0.444         | 0.439         | 0.442         |               | 0.016         | 0.023         | 0.020         | 0.024          | 0.013          |
| <i>zmpB_7</i>  | 0.417         | 0.416         | 0.419         | 0.461         | 0.521         | 0.486         |               | 0.020         | 0.018         | 0.024          | 0.015          |
| <i>zmpB_8</i>  | 0.629         | 0.603         | 0.612         | 0.634         | 0.674         | 0.679         | 0.577         |               | 0.014         | 0.022          | 0.018          |
| <i>zmpB_9</i>  | 0.619         | 0.617         | 0.625         | 0.627         | 0.681         | 0.653         | 0.574         | 0.411         |               | 0.021          | 0.017          |
| <i>zmpB_10</i> | 0.762         | 0.726         | 0.736         | 0.751         | 0.811         | 0.772         | 0.739         | 0.681         | 0.687         |                | 0.023          |
| <i>zmpD_11</i> | 0.399         | 0.459         | 0.458         | 0.378         | 0.463         | 0.461         | 0.502         | 0.660         | 0.660         | 0.810          |                |
