# Supplementary material for: Occurrence and Evolution of the Paralogous Zinc Metalloproteases IgA1 Protease, ZmpB, ZmpC, and ZmpD in Streptococcus pneumoniae and Related Commensal Species
Source: PubMed Central journal article supplement — mBio. 2012 Oct 2;3(5):e00303-12. doi: 10.1128/mBio.00303-12 (PMC3518915; doi:10.1128/mbio.00303-12), 2012-10-02
Supplement: mbo005121341st4.pdf [file mbo005121341st4.pdf]

**Table S4.** Strains screened for ZmpC protease activity

| <b>Species</b>             | <b>Strain</b>              | <b>ZmpC protease activity</b> |
|----------------------------|----------------------------|-------------------------------|
| <i>S. pneumoniae</i>       | TIGR4                      | Positive                      |
|                            | R6                         | Negative                      |
|                            | TIGR4 $\Delta$ <i>zmpC</i> | Negative                      |
|                            | TIGR4 $\Delta$ <i>zmpB</i> | Positive                      |
|                            | TIGR4 $\Delta$ <i>iga</i>  | Positive                      |
|                            | 274/95                     | Negative                      |
|                            | 276/95                     | Positive                      |
|                            | 415/98                     | Positive                      |
|                            | 14860                      | Positive                      |
|                            | <i>S. mitis</i>            | SK142                         |
| SK597                      |                            | Negative                      |
| SK609                      |                            | Negative                      |
| SK564                      |                            | Negative                      |
| SK137                      |                            | Positive                      |
| SK321                      |                            | Negative                      |
| SK579                      |                            | Negative                      |
| SK1073                     |                            | Negative                      |
| SK575                      |                            | Negative                      |
| SK569                      |                            | Negative                      |
| SK1080                     |                            | Negative                      |
| SK616                      |                            | Negative                      |
| <i>S. mitis</i> biovar 2   | SK95                       | Negative                      |
| <i>S. oralis</i>           | SK2                        | Negative                      |
|                            | SK141                      | Negative                      |
|                            | SK23                       | Negative                      |
|                            | SK255                      | Negative                      |
|                            | SK313                      | Negative                      |
|                            | SK610                      | Negative                      |
|                            | SK100                      | Negative                      |
|                            | SK10                       | Negative                      |
|                            | SK304                      | Negative                      |
|                            | SK1074                     | Negative                      |
| <i>S. pseudopneumoniae</i> | SK1069                     | Negative                      |
|                            | SK674                      | Negative                      |
| <i>S. sanguinis</i>        | SK112                      | Negative                      |
|                            | SK162                      | Negative                      |
|                            | SK115                      | Negative                      |
|                            | SK36                       | Negative                      |
|                            | SK49                       | Negative                      |
|                            | SK4                        | Negative                      |
|                            | SK85                       | Negative                      |

|                                                |                                 |          |
|------------------------------------------------|---------------------------------|----------|
| <i>S. gordonii</i>                             | SK7 (Challis NCTC 7868)         | Negative |
| <i>G. haemolysans</i>                          | SK1007 (CCUG 411)               | Negative |
|                                                | SK1008 (CCUG 4815)              | Negative |
|                                                | SK1009 (CCUG 28134)             | Negative |
|                                                | SK1012 (CCUG 37985; ATCC 10379) | Negative |
|                                                | SK940                           | Negative |
| <i>S. infantis</i>                             | SK1076                          | Negative |
|                                                | SK970                           | Negative |
|                                                | SK959                           | Negative |
| <i>S. anginosus</i>                            | SK52                            | Negative |
|                                                | SK1138                          | Negative |
|                                                | SK1267                          | Negative |
| <i>S. constellatus</i> subsp. <i>pharyngis</i> | SK1060                          | Negative |
| <i>S. intermedius</i>                          | SK54                            | Negative |
| <i>S. parasanguinis</i>                        | SK236                           | Negative |
| <i>S. australis</i>                            | SK956                           | Negative |
| <i>S. cristatus</i>                            | SK231                           | Negative |
| <i>S. peroris</i>                              | SK958                           | Negative |
| <i>Streptococcus</i> new species               | SK140                           | Negative |
| <i>Streptococcus</i> new species               | SK643                           | Negative |
